# Supplementary material
Source: MDPI journal article supplement (https://www.mdpi.com/2071-1050/13/21/12236)
Supplement: s1 [file s1]

Table S1. Land use requirements for alfalfa (according to Sys et al., 1993).

| Land Characteristics   | Class                                     |                                |                   |                    |                    |
|------------------------|-------------------------------------------|--------------------------------|-------------------|--------------------|--------------------|
|                        | S1<br>100 - 85                            | S2<br>85 - 60                  | S3<br>60 - 40     | N1<br>40 - 25      | N2<br>25 - 0       |
| Slope %                | < 4                                       | 4-8                            | 8-16              | -                  | > 16               |
| Drainage               | Good, Moderate                            | Imperf.                        | Poor and aeric    | Poor but drainable | Poor not drainable |
| Texture*               | SL, SCL, SC, L, CL, SiCl, C<60s, Co, SiCs | C<60v, LS, SiL, CL, C>60s, LfS | C>60v, fS, S, LcS | -                  | Cm, SiCm           |
| Soil depth (cm)        | >75                                       | 75-50                          | 50-20             | -                  | <20                |
| CaCO <sub>3</sub> %    | <15                                       | 15-25                          | 25-35             | -                  | >35                |
| PH                     | 7.4-8.0                                   | 8.0-8.2                        | 8.2-8.5           | -                  | >8.5               |
| EC <sub>e</sub> (dS/m) | < 5                                       | 5-9                            | 9-12              | -                  | >12                |

Table S2. Land use requirements for barley (modified from Sys et al., 1993).

| Land Characteristics   | Class                                                            |                         |                |                    |                    |
|------------------------|------------------------------------------------------------------|-------------------------|----------------|--------------------|--------------------|
|                        | S1<br>100 - 85                                                   | S2<br>85 - 60           | S3<br>60 - 40  | N1<br>40 - 25      | N2<br>25 - 0       |
| Slope %                | < 8                                                              | 8-12                    | 12-16          | -                  | > 16               |
| Drainage               | Good, Moderate                                                   | Imperf.                 | Poor and aeric | Poor but drainable | Poor not drainable |
| Texture*               | C<60s, Co, SiCs, SiCl, Si, SiL, CL, C<60v, SC, C>60s, L, SCL, SL | C>60v, LfS, LcS, fS, cS | -              | -                  | Cm, SiCm           |
| Soil depth (cm)        | >50                                                              | 50-20                   | 20-10          | -                  | <10                |
| CaCO <sub>3</sub> %    | <30                                                              | 30-40                   | 40-60          | -                  | >60                |
| PH                     | 7.2-8.0                                                          | 8.0-8.2                 | 8.2-8.5        | -                  | >8.5               |
| EC <sub>e</sub> (dS/m) | < 12                                                             | 12-16                   | 16-20          | 20-25              | >25                |

Table S3. Land use requirements for beans (according to Zakarya, 2009).

| Land Characteristics | Class                         |               |                |                    |                        |
|----------------------|-------------------------------|---------------|----------------|--------------------|------------------------|
|                      | S1<br>100 - 85                | S2<br>85 - 60 | S3<br>60 - 40  | N1<br>40 - 25      | N2<br>25 - 0           |
| Slope %              | < 4                           | 4-8           | 8-16           | -                  | > 16                   |
| Drainage             | Good                          | Moderate      | Imperf.        | Poor but drainable | Poor but not drainable |
| Texture              | L, SCL, SC, SiL, SiCL, CL, Si | SL, LS, LfS   | LcS, fS, S, CS | -                  | Cm, SiCm               |
| Soil depth (cm)      | >75                           | 75-50         | 50-20          | -                  | <20                    |
| CaCO <sub>3</sub> %  | <12                           | 12-20         | 20-25          | -                  | >25                    |
| PH                   | 5.8-7.6                       | 7.6-8.0       | 8.0-8.2        | -                  | >8.2                   |
| EC (dS/m)            | < 1.5                         | 1.5-2.5       | 2.5-3.5        | 3.5-7              | >7                     |

Table S4. Land use requirements for green pepper (according to Zakarya, 2009).

| Land Characteristics | Class                                     |                 |                |                    |                    |
|----------------------|-------------------------------------------|-----------------|----------------|--------------------|--------------------|
|                      | S1<br>100 - 85                            | S2<br>85 - 60   | S3<br>60 - 40  | N1<br>40 - 25      | N2<br>25 - 0       |
| Slope                | < 4                                       | 4-8             | 8-16           | -                  | > 16               |
| Drainage             | Good, moderate                            | Imperf.         | Poor and aeric | Poor but drainable | Poor not drainable |
| Texture              | SCL, SL, L, SiCL, LfS, SC, SiCSiL, Si, CL | LS, LcS, fS, cS | -              | -                  | Cm, SiCm           |
| Soil depth           | >75                                       | 75-50           | 50-25          | <25                | <25                |
| CaCO <sub>3</sub> %  | 0-12                                      | 12-25           | 25-35          | 35-50              | >50                |
| PH                   | 6.5-7.5                                   | 7.5-8           | 8-8.2          | 8.2-8.5            | >8.5               |
| EC (dS/m)            | < 3                                       | 3-5             | 5-8            | -                  | >8                 |

Table S5. Land use requirements for groundnuts (according to Zakarya, 2009).

| Land Characteristics | Class                      |               |               |                    |                    |
|----------------------|----------------------------|---------------|---------------|--------------------|--------------------|
|                      | S1<br>100 - 85             | S2<br>85 - 60 | S3<br>60 - 40 | N1<br>40 - 25      | N2<br>25 - 0       |
| Slope                | < 4                        | 4-8           | 8-16          | > 16               | > 16               |
| Drainage             | good                       | moderate      | Imperf.       | Poor but drainable | Poor not drainable |
| Texture              | L,SCL,SL,SiCL,SiL,Si,CL,SC | LfS, LS, SiC  | LcS, fS, cS   | -                  | Cm,SiCm            |
| Soil depth           | >75                        | 75-50         | 50-25         | -                  | <25                |
| CaCO3 %              | 0-12                       | 12-25         | 25-35         | 35-50              | >50                |
| PH                   | 6.5-7.5                    | 7.5-8         | 8-8.2         | 8.2-8.5            | >8.5               |
| EC (dS/m)            | < 4                        | 4-6           | 6-8           | 8-12               | >12                |

Table S6. Land use requirements for maize (according to Zakarya, 2009).

| Land Characteristics | Class                                 |               |               |                    |                        |
|----------------------|---------------------------------------|---------------|---------------|--------------------|------------------------|
|                      | S1<br>100 - 85                        | S2<br>85 - 60 | S3<br>60 - 40 | N1<br>40 - 25      | N2<br>25 - 0           |
| Slope                | < 4                                   | 4-8           | 8-16          | -                  | > 16                   |
| Drainage             | good                                  | moderate      | Imperf.       | Poor but drainable | Poor but not drainable |
| Texture              | C, SiC, SiCL, Si, SiL, CL, SC, L, SCL | SL, LS, LfS   | fS, LcS, cS   | -                  | Cm, SiCm               |
| Soil depth           | >75                                   | 75-50         | 50-20         | -                  | <20                    |
| CaCO3 %              | 0-15                                  | 15-25         | 25-35         | -                  | >35                    |
| PH                   | 6.5-8                                 | 8-8.2         | 8.2-8.5       | 8.5-9              | >9                     |
| EC (dS/m)            | < 4                                   | 4-6           | 6-8           | 8-16               | >16                    |

Table S7. Land use requirements for onion (according to Sys et al., 1993).

| Land Characteristics   | Class                                     |                           |                |                    |                    |
|------------------------|-------------------------------------------|---------------------------|----------------|--------------------|--------------------|
|                        | S1<br>100 - 85                            | S2<br>85 - 60             | S3<br>60 - 40  | N1<br>40 - 25      | N2<br>25 - 0       |
| Slope %                | < 4                                       | 4-8                       | 8-16           | -                  | > 16               |
| Drainage               | Good, Moderate                            | Imperf.                   | Poor and aeric | Poor but drainable | Poor not drainable |
| Texture*               | L, SC, SCL, SiCs, Si, SL, SiCl, C<60s, Co | C<60v, C>60s, fS LS, LfS, | C>60v, S, LcS  | -                  | Cm,SiCm            |
| Soil depth (cm)        | >50                                       | 50-30                     | 30-20          | -                  | <20                |
| CaCO3 %                | <5                                        | 5-10                      | 10-20          | -                  | >20                |
| PH                     | 7.4-8.0                                   | 8.0-8.2                   | 8.2-8.5        | -                  | >8.5               |
| EC <sub>e</sub> (dS/m) | < 3                                       | 3-5                       | 5-12           | -                  | >12                |

Table S8. Land use requirements for potato (according to Zakarya, 2009).

| Land Characteristics | Class                             |               |                     |                    |                        |
|----------------------|-----------------------------------|---------------|---------------------|--------------------|------------------------|
|                      | S1<br>100 - 85                    | S2<br>85 - 60 | S3<br>60 - 40       | N1<br>40 - 25      | N2<br>25 - 0           |
| Slope                | < 4                               | 4-8           | 8-16                | -                  | > 16                   |
| Drainage             | good                              | moderate      | Imperf.             | Poor but drainable | Poor but not drainable |
| Texture              | L, SCL, SC, SiL, SiCL, CL, Si, SL | LS, LfS       | LcS, SiC, fS, S, cS | -                  | Cm,SiCm                |
| Soil depth           | >60                               | 60-40         | 40-20               | -                  | <20                    |
| CaCO3 %              | < 10                              | 10-15         | 15-30               | -                  | >30                    |
| PH                   | 6.5-7.5                           | 7.5-8.0       | 8.0-8.2             | 8.2-8.5            | >8.5                   |
| EC (dS/m)            | < 1.7                             | 1.7-2.5       | 2.5-4               | 4-6                | >6                     |
|                      | 3                                 | 5             | 6                   | 10                 |                        |

Table S9. Land use requirements for sesame (modified according to Sys et al., 1993).

| Land Characteristics   | Class                               |               |                |                    |                    |
|------------------------|-------------------------------------|---------------|----------------|--------------------|--------------------|
|                        | S1<br>100 - 85                      | S2<br>85 - 60 | S3<br>60 - 40  | N1<br>40 - 25      | N2<br>25 - 0       |
| Slope %                | < 4                                 | 4 - 8         | 8 -16          | -                  | > 16               |
| Drainage               | Good, Moderate                      | Imperf.       | Poor and aeric | Poor but drainable | Poor not drainable |
| Texture*               | L, SCL, SL, SiCL, CL, SiCs, SiL, SC | Cs, Co, LS    | C>60, S        | -                  | Cm, SiCm           |
| Soil depth (cm)        | >75                                 | 75-50         | 50 -30         | -                  | <30                |
| CaCO <sub>3</sub> %    | Not exist <30                       | 30-40         | 40-60          | -                  | >60                |
| PH                     | 6.3-7.0                             | 7.0-7.5       | 7.5-8.2        | -                  | >8.2               |
| EC <sub>e</sub> (dS/m) | <4                                  | 4-6           | 6-8            | -                  | >8                 |

Table S10. Land use requirements for sorghum (modified according to Sys et al., 1993).

| Land Characteristics   | Class                                                    |                    |                |                    |                    |
|------------------------|----------------------------------------------------------|--------------------|----------------|--------------------|--------------------|
|                        | S1<br>100 - 85                                           | S2<br>85 - 60      | S3<br>60 - 40  | N1<br>40 - 25      | N2<br>25 - 0       |
| Slope %                | < 4                                                      | 4 - 8              | 8 -16          | -                  | > 16               |
| Drainage               | Good, Moderate                                           | Imperf.            | Poor and aeric | Poor but drainable | Poor not drainable |
| Texture*               | C<60s, SiC, Co, SiCL, Si, SiL, SC, C<60v, C>60s, L, SCL, | C>60v, SL, LfS, LS | S, fS, LeS     | -                  | Cm, SiCm, cS       |
| Soil depth (cm)        | >50                                                      | 50-20              | 20 -10         | -                  | <10                |
| CaCO <sub>3</sub> %    | <30                                                      | 30-45              | 45-75          | -                  | >75                |
| PH                     | 6.5-8.2                                                  | 8.2-8.3            | 8.3-8.5        | -                  | >8.5               |
| EC <sub>e</sub> (dS/m) | <8                                                       | 8-12               | 12-16          | 16-20              | >20                |

Table S11. Land use requirements for soybean (modified according to Sys et al., 1993).

| Land Characteristics   | Class                                                              |                   |                |                    |                    |
|------------------------|--------------------------------------------------------------------|-------------------|----------------|--------------------|--------------------|
|                        | S1<br>100 - 85                                                     | S2<br>85 - 60     | S3<br>60 - 40  | N1<br>40 - 25      | N2<br>25 - 0       |
| Slope %                | < 4                                                                | 4 - 8             | 8 -16          | -                  | > 16               |
| Drainage               | Good, Moderate                                                     | Imperf.           | Poor and aeric | Poor but drainable | Poor not drainable |
| Texture*               | C<60s, SiC, Co, SiCL, Si, SiL, CL, SC, C<60v, C>60s, L, SCL, C<60v | C>60v SL, LfS, LS | S, fS, LeS     | -                  | Cm, SiCm, cS       |
| Soil depth (cm)        | >75                                                                | 75-50             | 50-20          | -                  | <20                |
| CaCO <sub>3</sub> %    | <15                                                                | 15-20             | 20-25          | -                  | >25                |
| PH                     | 6.5-7.5                                                            | 7.5-8.0           | 8.0-8.5        | -                  | >8.5               |
| EC <sub>e</sub> (dS/m) | <6                                                                 | 6-8               | 8-10           | 10-12              | >12                |

Table S12. Land use requirements for sugar beet (modified according to Sys et al., 1993).

| Land Characteristics | Class                                                    |                    |                |                    |                    |
|----------------------|----------------------------------------------------------|--------------------|----------------|--------------------|--------------------|
|                      | S1<br>100 - 85                                           | S2<br>85 - 60      | S3<br>60 - 40  | N1<br>40 - 25      | N2<br>25 - 0       |
| Slope %              | < 4                                                      | 4 - 8              | 8 -16          | -                  | > 16               |
| Drainage             | Good, Moderate                                           | Imperf.            | Poor and aeric | Poor but drainable | Poor not drainable |
| Texture*             | C<60s, SiC, Co, SiCL, Si, SiL, SC, C<60v, C>60s, L, SCL, | C>60v, SL, LfS, LS | S, fS, LeS     | -                  | Cm, SiCm, cS       |
| Soil depth (cm)      | >50                                                      | 50-20              | 20 -10         | -                  | <10                |
| CaCO <sub>3</sub> %  | <30                                                      | 30-45              | 45-75          | -                  | >75                |

|                        |         |         |         |       |      |
|------------------------|---------|---------|---------|-------|------|
| PH                     | 6.5-8.2 | 8.2-8.3 | 8.3-8.5 | -     | >8.5 |
| EC <sub>e</sub> (dS/m) | <8      | 8-12    | 12-16   | 16-24 | >24  |

Table S13. Land use requirements for sunflower (according to Sys et al., 1993).

| Land Characteristics | Class                                                        |                    |                |                    |                    |
|----------------------|--------------------------------------------------------------|--------------------|----------------|--------------------|--------------------|
|                      | S1<br>100 - 85                                               | S2<br>85 - 60      | S3<br>60 - 40  | N1<br>40 - 25      | N2<br>25 - 0       |
| Slope %              | < 4                                                          | 4 - 8              | 8 -16          | -                  | > 16               |
| Drainage             | Good, Moderate                                               | Imperf.            | Poor and aeric | Poor but drainable | Poor not drainable |
| Texture*             | C<60s, SiC, Co, SiCL, Si, SiL, CL, SC, C<60v, C>60s, L, SCL, | C>60v, SL, LfS, LS | S, fS, LcS     | -                  | Cm, SiCm, cS       |
| Soil depth (cm)      | >100                                                         | 100-75             | 75 -50         | -                  | <50                |
| CaCO <sub>3</sub> %  | <15                                                          | 15-25              | 25-35          | -                  | >35                |
| PH                   | 6.5-7.5                                                      | 7.5-8.0            | 7.8-8.5        | -                  | >8.5               |
| ECe (dS/m)           | <4                                                           | 4-9                | 9-12           | -                  | >12                |

Table S14. Land use requirements for tomato (according to Zakarya, 2009).

| Land Characteristics | Class                              |               |               |                    |                        |
|----------------------|------------------------------------|---------------|---------------|--------------------|------------------------|
|                      | S1<br>100 - 85                     | S2<br>85 - 60 | S3<br>60 - 40 | N1<br>40 - 25      | N2<br>25 - 0           |
| Slope                | < 4                                | 4-8           | 8-16          | -                  | > 16                   |
| Drainage             | good                               | moderate      | Imperf.       | Poor but drainable | Poor but not drainable |
| Texture              | CL, L, SiCL, Si, SiC, Co, SC, SCL, | LS, LfS, SL   | fS,LcS        | -                  | Cm,SiCm                |
| Soil depth           | >100                               | 100-75        | 75-50         | -                  | <50                    |
| CaCO <sub>3</sub> %  | < 10                               | 10-15         | 15-25         | 25-30              | >30                    |
| PH                   | 6.5-7.5                            | 7.5-8         | 8-8.5         | 8.5-9              | >9                     |
| EC (dS/m)            | < 5                                | 5-8           | 8-10          | -                  | >10                    |

Table S15. Land use requirements for wheat (modified according to Sys et al., 1993).

| Land Characteristics | Class                                             |               |                      |                    |                    |
|----------------------|---------------------------------------------------|---------------|----------------------|--------------------|--------------------|
|                      | S1<br>100 - 85                                    | S2<br>85 - 60 | S3<br>60 - 40        | N1<br>40 - 25      | N2<br>25 - 0       |
| Slope %              | < 4                                               | 4-8           | 8-16                 | -                  | > 16               |
| Drainage             | Good, Moderate                                    | Imperf.       | Poor and aeric       | Poor but drainable | Poor not drainable |
| Texture              | C<60s, SiC, Co, Si, SiL, CL, C<60v, SC, C>60s, L, | C>60v, SCL    | SL, LfS, LcS, fS, cS | -                  | Cm, SiCm           |
| Soil depth (cm)      | >50                                               | 50-20         | 20-10                | -                  | <10                |
| CaCO <sub>3</sub> %  | <30                                               | 30-40         | 40-60                | -                  | >60                |
| PH                   | 7.0-8.2                                           | 8.2-8.3       | 8.3-8.5              | -                  | >8.5               |
| EC (dS/m)            | < 3                                               | 3-5           | 5-6                  | 6-10               | >10                |

\* adapted after Sys et al., 1993.

\*\* After Rhoades et al. (1992); Fipps (2003) and various sources. \*\*\* adapted after Zakarya, 2009.
